# Supplementary material
Source: PubMed Central journal article supplement (PMC9212699)
Supplement: mmc1.pdf [file mmc1.pdf]

**Cell, Volume 185**

**Supplemental information**

**Structural basis of human ACE2 higher binding**

**affinity to currently circulating Omicron**

**SARS-CoV-2 sub-variants BA.2 and BA.1.1**

**Linjie Li, Hanyi Liao, Yumin Meng, Weiwei Li, Pengcheng Han, Kefang Liu, Qing Wang, Dedong Li, Yanfang Zhang, Liang Wang, Zheng Fan, Yuqin Zhang, Qiyue Wang, Xin Zhao, Yeping Sun, Niu Huang, Jianxun Qi, and George Fu Gao**

**Table S1. Data collection and refinement statistics, Related to Figure 2**

|                                                     | Omicron BA.1.1         | Omicron BA.2           | Omicron BA.3           |
|-----------------------------------------------------|------------------------|------------------------|------------------------|
| <b>Data collection</b>                              |                        |                        |                        |
| Space group                                         | P41                    | P41212                 | P41212                 |
| Cell dimensions                                     |                        |                        |                        |
| <i>a</i> , <i>b</i> , <i>c</i> (Å)                  | 129.52, 129.52, 189.20 | 102.26, 103.26, 224.85 | 101.05, 101.05, 222.21 |
| $\alpha$ , $\beta$ , $\gamma$ (°)                   | 90, 90, 90             | 90.00, 90, 90.00       | 90, 90, 90             |
| Wavelength (Å)                                      | 0.979                  | 0.979                  | 0.979                  |
| Resolution (Å)                                      | 50-3.00(3.11-3.00)     | 50-2.90 (3.00-2.90)    | 50-2.70 (2.80-2.70)    |
| <i>R</i> <sub>merge</sub>                           | 0.173 (1.461)          | 0.190 (1.256)          | 0.148 (1.619)          |
| <i>R</i> <sub>pim</sub>                             | 0.075 (0.635)          | 0.064(0.452)           | 0.045 (0.408)          |
| CC1/2                                               | 0.995 (0.639)          | 0.988 (0.727)          | 0.998 (0.642)          |
| <i>I</i> / $\sigma$ <i>I</i>                        | 11.3 (1.4)             | 13.3 (1.3)             | 16.6 (1.6)             |
| Completeness (%)                                    | 99.9 (99.9)            | 96.5(97.8)             | 99.8(99.6)             |
| No. reflections                                     | 62359                  | 26827                  | 32546                  |
| Redundancy                                          | 6.2 (6.1)              | 8.8 (8.3)              | 10.9(9.5)              |
| <b>Refinement</b>                                   |                        |                        |                        |
| Resolution (Å)                                      | 37.59-3.00             | 19.66-2.90             | 49.27-2.70             |
| No. reflections                                     | 54430                  | 26098                  | 30027                  |
| <i>R</i> <sub>work</sub> / <i>R</i> <sub>free</sub> | 0.1970 /0.2294         | 0.2156/0.2552          | 0.21.40/0.24.80        |
| No. atoms                                           |                        |                        |                        |
| Protein                                             | 13046                  | 6556                   | 6601                   |
| Ligand/ion                                          | 2                      | 1                      | 1                      |
| Water                                               | 0                      | 0                      | 0                      |
| <i>B</i> -factors                                   |                        |                        |                        |
| Protein                                             | 57.9                   | 58.0                   | 50.5                   |
| Ligand/ion                                          | 53.8                   | 66.1                   | 69.6                   |
| Water                                               |                        |                        | 35.1                   |
| R.m.s. deviations                                   |                        |                        |                        |
| Bond lengths (Å)                                    | 0.004                  | 0.003                  | 0.002                  |
| Bond angles (°)                                     | 0.668                  | 0.535                  | 0.519                  |
| Ramachandran plot                                   |                        |                        |                        |
| Favored (%)                                         | 96.76                  | 96.95                  | 97.71                  |
| Allowed (%)                                         | 2.99                   | 3.05                   | 2.29                   |
| Outliers (%)                                        | 0.25                   | 0                      | 0                      |

\*Values in parentheses are for highest-resolution shell.

**Table S2 Amino acid residues comparison of PT-RBD, Omicron BA.1-RBD, Omicron BA.1.1-RBD, Omicron BA.2-RBD, Omicron BA.3-RBD interacting with hACE2, Related to Figure 2**

| hACE2                 | PT-RBD                                                         | Omicron BA.1-RBD                                              | Omicron BA.1.1-RBD                                           | Omicron BA.2-RBD                                               | Omicron BA.3-RBD                                                        |
|-----------------------|----------------------------------------------------------------|---------------------------------------------------------------|--------------------------------------------------------------|----------------------------------------------------------------|-------------------------------------------------------------------------|
| S19 (7/17/18/18/14)   | A475 (3, <u>1</u> ), G476 (4)                                  | A475 (3, <u>1</u> ), G476 (3), N477 (11, <u>1</u> )           | A475 (2), G476 (3), N477 (13, <u>3</u> )                     | N477 (12, <u>4</u> ), G476 (3), A475 (3, <u>1</u> )            | N477 (11, <u>2</u> ), A475 (3, <u>1</u> )                               |
| Q24 (24/22/21/31/26)  | A475 (4), G476 (5), N487 (15, <u>1</u> )                       | A475 (3), G476 (5), N477 (1), N487 (13, <u>1</u> )            | A475 (3), G476 (3), N477 (1), N487 (13, <u>1</u> ), Y489 (1) | N487 (11, <u>2</u> ), G476 (8), A475 (7), N477 (4), Y489 (1)   | N487 (14, <u>2</u> ), A475 (4), G476 (4), N477 (3, <u>1</u> ), Y489 (1) |
| T27 (15/13/14/19/16)  | F456 (5), Y473 (1), A475 (2), Y489 (7)                         | F456 (5), Y473 (1), A475 (2), Y489 (5)                        | F456 (5), Y473 (1), A475 (2), Y489 (6)                       | F456 (8), Y489 (6), Y473 (3), A475 (2)                         | F456 (6), Y489 (6), A475 (2), Y473 (2)                                  |
| F28 (7/9/5/11/10)     | Y489 (7)                                                       | Y489 (9)                                                      | Y489 (5)                                                     | Y489 (11)                                                      | Y489 (10)                                                               |
| D30 (10/2/3/10/5)     | K417 (4, <u>1</u> ), L455 (2), F456 (4)                        | L455 (1), F456 (1)                                            | L455 (1), F456 (2)                                           | F456 (5), L455 (5)                                             | F456 (3), L455 (2)                                                      |
| K31 (19/15/15/25/16)  | L455 (2), F456 (5), E484 (1), Y489 (6), F490 (2), Q493 (3)     | L455 (1), F456 (4), Y489 (6), R493 (4),                       | F456 (6), Y489 (7), R493 (2)                                 | Y489 (11), F456 (8), R493 (4), L455 (2)                        | Y489 (6), F456 (5), R493 (3), L455 (2)                                  |
| H34 (20/29/34/23/22)  | Y453 (5, <u>1</u> ), L455 (9), Q493 (6)                        | Y453 (10, <u>2</u> ), R493 (11), S494 (8)                     | N417 (2), Y453 (9, <u>2</u> ), L455 (7), R493 (16)           | L455 (10), Y453 (10, 1), N417 (2), R493 (1)                    | L455 (12), Y453 (7), N417 (2), R493 (1)                                 |
| E35 (8/6/13/6/10)     | Q493 (8)                                                       | R493 (6, <u>1</u> )                                           | R493 (13, <u>2</u> )                                         | R493 (6, <u>2</u> )                                            | R493 (10, <u>1</u> )                                                    |
| E37 (7/2/2/1/1)       | Y505 (7)                                                       | H505 (2)                                                      | H505 (2)                                                     | H505 (1)                                                       | H505 (1)                                                                |
| D38 (15/19/12/17/18)  | Y449 (9, <u>1</u> ), G496 (5), Q498 (1)                        | Y449 (7, <u>2</u> ), S496 (6), R498 (5, <u>2</u> ), Y501 (1)  | R493 (6, <u>2</u> ), S494 (1), S496 (5, <u>1</u> )           | Y449 (9, <u>2</u> ), R498 (6, <u>2</u> ), Y501 (1), G496 (1)   | Y449 (9, 2), R498 (6, <u>2</u> ), G496 (2), Y501 (1)                    |
| Y41 (23/25/29/30/31)  | Q498 (8), T500 (7, <u>1</u> ), N501 (8, <u>1</u> )             | R498 (3), T500 (7, <u>2</u> ), Y501 (15)                      | R498 (6), T500 (9, <u>1</u> ), Y501 (14)                     | Y501 (15), T500 (9, 2), R498 (6)                               | Y501 (17), T500 (8, <u>2</u> ), R498 (6)                                |
| Q42 (16/9/8/12/11)    | G446 (4, <u>1</u> ), Y449 (4, 1), Q498 (8, <u>3</u> )          | Y449 (2, <u>1</u> ), R498 (7)                                 | Y449 (1), R498 (7)                                           | R498 (7), Y449 (5, <u>1</u> )                                  | R498 (9), Y449 (2, <u>1</u> )                                           |
| L45 (4/1/1/1/1)       | Q498 (3), T500 (1)                                             | T500 (1)                                                      | R498 (1)                                                     | T500 (1)                                                       | T500 (1)                                                                |
| L79 (2/2/1/2/3)       | F486 (2)                                                       | F486 (2)                                                      | F486 (1)                                                     | F486 (2)                                                       | F486 (3)                                                                |
| M82 (9/7/12/21/13)    | F486 (9)                                                       | F486 (7)                                                      | F486 (12)                                                    | F486 (21)                                                      | F486 (13)                                                               |
| Y83 (20/22/14/28/25)  | F486 (11), N487 (8, <u>1</u> ), Y489 (1)                       | F486 (11), N487 (10, <u>1</u> ), Y489 (1, <u>1</u> )          | F486 (8), N487 (5, <u>1</u> ), Y489 (1)                      | N487 (13, <u>1</u> ), F486 (12), Y489 (3, <u>1</u> )           | N487 (11, <u>1</u> ), F486 (11), Y489 (3, <u>1</u> )                    |
| N330 (8/8/4/8/9)      | T500 (8)                                                       | T500 (8)                                                      | T500 (4)                                                     | T500 (8)                                                       | T500 (9)                                                                |
| K353 (50/57/49/60/57) | G496 (7, <u>1</u> ), N501 (11), G502 (4, <u>1</u> ), Y505 (28) | Y495 (1), S496 (2), Y501 (21), G502 (6, <u>1</u> ), H505 (27) | S496 (2), Y501 (18), G502 (4, <u>1</u> ), H505 (25)          | H505 (29, <u>1</u> ), Y501 (24), G502 (6, <u>1</u> ), Y495 (1) | H505 (31), Y501 (20), G502 (6, <u>1</u> )                               |
| G354 (11/11/9/11/11)  | G502 (7), Y505 (4)                                             | G502 (7), H505 (4)                                            | G502 (7), H505 (2)                                           | G502 (7), H505 (4)                                             | G502 (7), H505 (4)                                                      |
| D355 (9/8/10/14/13)   | T500 (8, <u>1</u> ), G502 (1)                                  | T500 (7), G502 (1)                                            | T500 (9, <u>2</u> ), G502 (1)                                | T500 (11), G502 (3)                                            | T500 (10), G502 (3)                                                     |
| R357 (3/3/3/5/5)      | T500 (3)                                                       | T500 (3)                                                      | T500 (3, <u>1</u> )                                          | T500 (5)                                                       | T500 (5)                                                                |
| R393 (1/0/0/0/0)      | Y505 (1)                                                       |                                                               |                                                              |                                                                |                                                                         |
| Total                 | 288, <u>16</u>                                                 | 287, <u>16</u>                                                | 290, <u>17</u>                                               | 353, <u>18</u>                                                 | 317, <u>15</u>                                                          |

The numbers in parentheses of PT-RBD, Omicron BA.1-RBD, Omicron BA.1.1-RBD, Omicron BA.2-RBD, Omicron BA.3-RBD residues represent the number of vdw contacts between the indicated residues with hACE2. The numbers with underline suggest numbers of H-bonds and salt bridges between the pairs of residues. Vdw contact was analyzed at a cutoff of 4.5 Å and H-bonds/salt bridges at a cutoff of 3.5 Å.

**Table S3. Number of contacts residues and different types of atom contacts formed between hACE2 and the four Omicron sub-variants, Related to Figure 2**

|               | Number of contact residues* | Number of vdw contacts | Number of hydrogen bonds | Number of salt bridges | Total Number of atom contacts |
|---------------|-----------------------------|------------------------|--------------------------|------------------------|-------------------------------|
| <b>BA.1</b>   | 21/20                       | 268                    | 13                       | 3                      | 287                           |
| <b>BA.1.1</b> | 21/20                       | 257                    | 13                       | 4                      | 277                           |
| <b>BA.2</b>   | 21/20                       | 331                    | 16                       | 2                      | 353                           |
| <b>BA.3</b>   | 21/19                       | 298                    | 13                       | 2                      | 317                           |

\* Number of hACE2 contact residues/number of RBD contact residues

**Table S4. Comparison of MM/PBSA binding energy calculation results between BA.1 RBD/hACE2 complex and G496 BA.1 RBD/hACE2 systems, Related to Figure 3**

|                                             | $\Delta E_{\text{Binding}}$  |                                   | $\Delta \Delta E_{\text{Binding}}$                                                          |
|---------------------------------------------|------------------------------|-----------------------------------|---------------------------------------------------------------------------------------------|
|                                             | BA.1 RBD/hACE2<br>(kcal/mol) | G496 BA.1 RBD/hACE2<br>(kcal/mol) | ( $\Delta E_{\text{Binding\_G496 BA.1-}} - \Delta E_{\text{Binding\_BA.1}}$ )<br>(kcal/mol) |
| <b>RBD-ACE2</b> <sup>a</sup>                | -585.26 ± 1.12               | -590.60 ± 1.12                    | -5.34                                                                                       |
| <b>R408<sub>RBD</sub></b> <sup>b</sup>      | -48.98 ± 0.12                | -49.94 ± 0.10                     | -0.96                                                                                       |
| <b>D38<sub>ACE2</sub></b> <sup>b</sup>      | -23.16 ± 0.13                | -24.00 ± 0.14                     | -0.84                                                                                       |
| <b>S496/G496<sub>RBD</sub></b> <sup>b</sup> | 1.12 ± 0.03                  | 0.41 ± 0.01                       | -0.71                                                                                       |
| <b>R498<sub>RBD</sub></b> <sup>b</sup>      | -57.15 ± 0.09                | -57.79 ± 0.09                     | -0.64                                                                                       |
| <b>K440<sub>RBD</sub></b> <sup>b</sup>      | -53.76 ± 0.18                | -54.36 ± 0.15                     | -0.60                                                                                       |
| <b>R403<sub>RBD</sub></b> <sup>b</sup>      | -57.26 ± 0.07                | -57.84 ± 0.07                     | -0.58                                                                                       |

<sup>a</sup> Averaged binding energy calculated by MM/PBSA.

<sup>b</sup> Energy decomposition of single residues with favorable binding energies ( $\Delta E_{\text{G496}} - \Delta E_{\text{S496}} \leq -0.5$  kcal·mol<sup>-1</sup>).
